# Supplementary material for: Insights into the correlation between Physiological changes in and seed development of tartary buckwheat (Fagopyrum tataricum Gaertn.)
Source: PubMed Central journal article supplement (PMC6119279; doi:10.1186/s12864-018-5036-8), 2018-08-31
Supplement: 12864_2018_5036_MOESM1_ESM.pdf [file 12864_2018_5036_MOESM1_ESM.pdf]

1 **Title: Insights into the Correlation between Physiological Changes in and Seed Development of**  
2 **Tartary Buckwheat (*Fagopyrum tataricum* Gaertn.)**

3 **Running Title:** Tartary Buckwheat Seed Development

4 **Moyang Liu<sup>†</sup>, Zhaotang Ma<sup>†</sup>, Tianrun Zheng, Wenjun Sun, Yanjun Zhang, Weiqiong Jin,**  
5 **Junyi Zhan, Yuntao Cai, Yujia Tang, Qi Wu, Zizhong Tang, Tongliang Bu, Chenglei Li and**  
6 **Hui Chen<sup>\*</sup>**

7 Sichuan Agricultural University, College of Life Science, Ya'an, China

8 <sup>†</sup>Contributed equally

9 **\*Correspondence:** chenhui@sicau.edu.cn

10 **Co-authors email address:**

11 lmyyunxi@163.com, WaohUncle\_Ma@163.com, kobezey@163.com, sunnan82475@163.com,  
12 15227793373@163.com, Joan541573@163.com, zhanjunyi0412@163.com, caiyt410725@163.com,  
13 2049528646@qq.com, wuqi@sicau.edu.cn, 3530279123456789@163.com, tlbu@163.com,  
14 gezhucao1998@yahoo.com.cn

15

16

17

18

19

20

21

22

23

24

25

26 **Additional file Figures:**

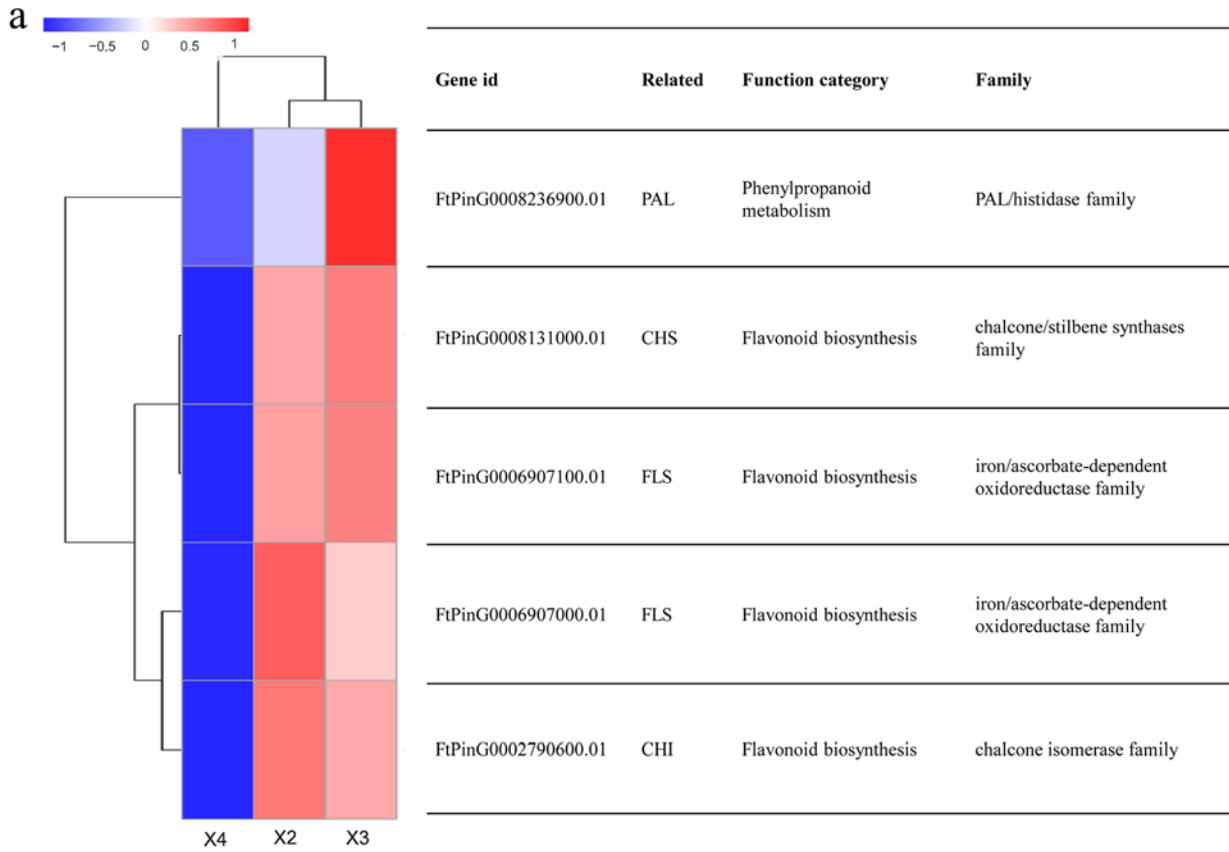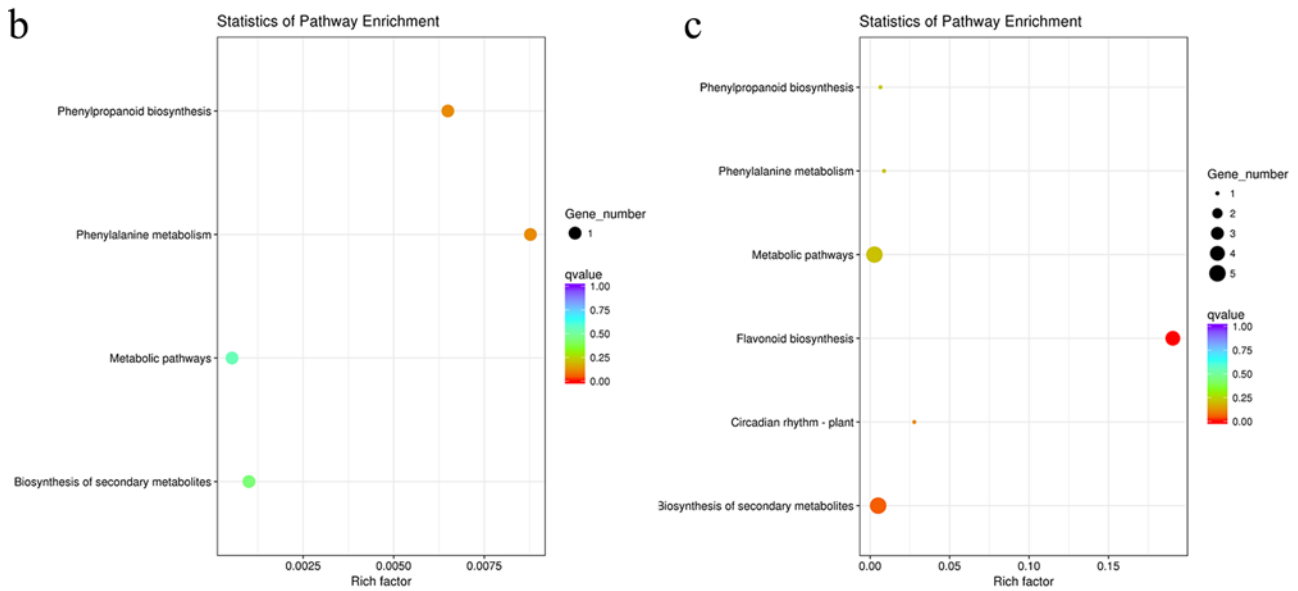

27

**Figure S1** DEGs related to flavonoid in three samples.

29 (a) Hierarchical cluster of the DEGs related to flavonoid in X2 (13 DPA), X3 (19 DPA), and X4 (25  
30 DPA). Red: high expression; Blue: low expression.

31 (b) Scatterplot of KEGG pathway enrichment in X2 (13 DPA) vs X3 (19 DPA) (FDR < 0.05).

32 (c) Scatterplot of KEGG pathway enrichment in X3 (19 DPA) vs X4 (25 DPA) (FDR < 0.05).

33 Rich factor is the ratio of the number of DEGs to the number of background genes in a KEGG  
34 pathway.

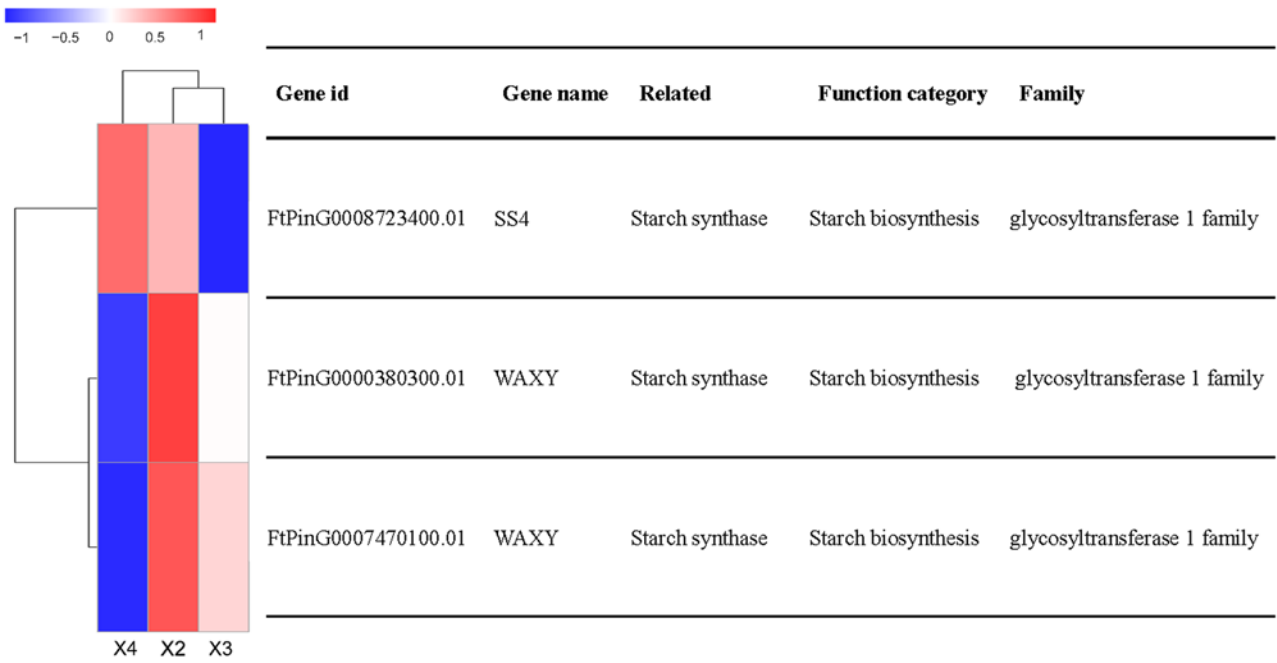

35

**Figure S2** DEGs related to starch in three samples. Hierarchical cluster of the DEGs related to starch in X2 (13 DPA), X3 (19 DPA) and X4 (25 DPA). Red: high expression; Blue: low expression.

37

38

39

40

41

42

43

44

45

46

47

48

49

50

51

52

53

54

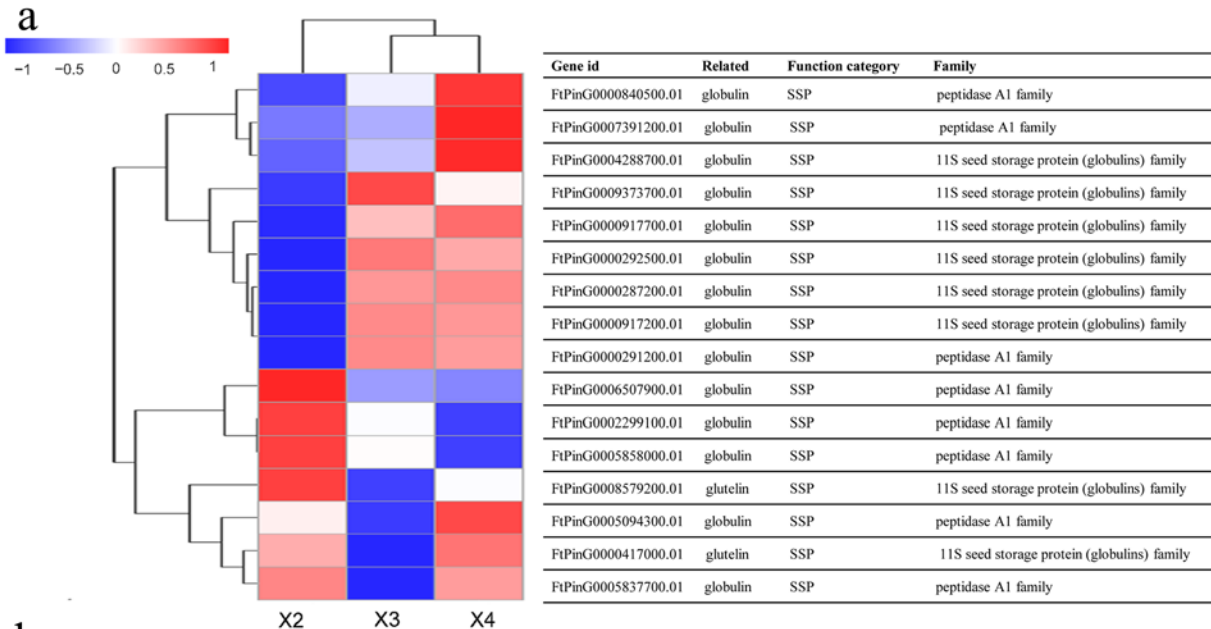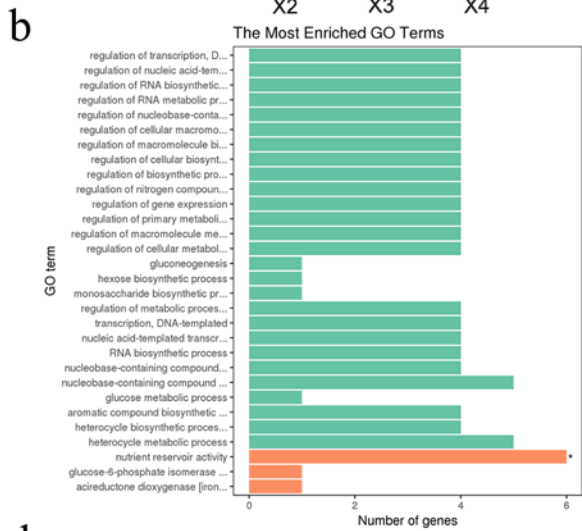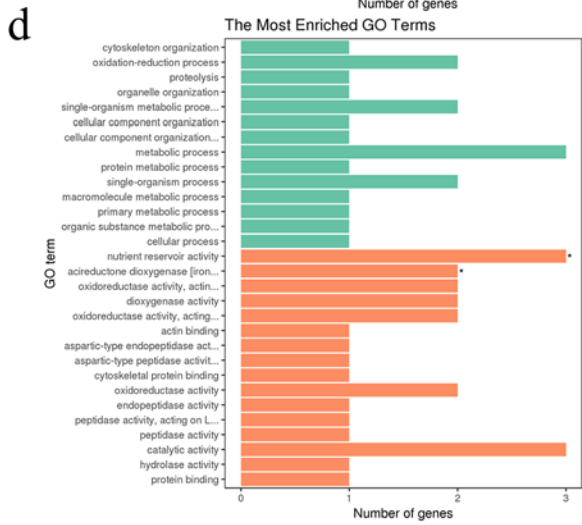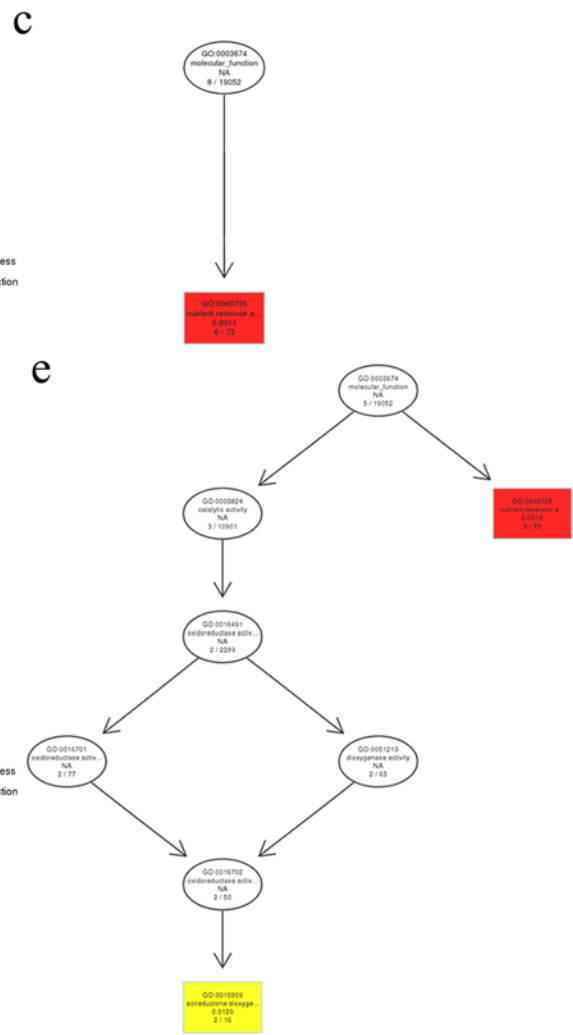

55

**Figure S3** DEGs related to storage genes protein in three samples.

57

(a) Hierarchical cluster of the DEGs related to storage protein in X2 (13 DPA), X3 (19 DPA), and

58

X4 (25 DPA). Red: high expression; Blue: low expression.

59

(b) GO classification of DEGs in X2 (13 DPA) vs X3 (19 DPA) (FDR < 0.05). The top 30 enriched

60 GO classifications are listed. Stars above bars indicate the amounts of differentially expressed  
61 genes are significantly higher or lower than the amounts of genes in random samples from the  
62 GO classification of all genes.

63 (c) The DEGs related to storage protein enriched molecular function in X2 (13 DPA) vs X3 (19  
64 DPA). The different color frames indicate the extent of significance. Red: extremely significant.

65 (d) GO classification of DEGs in X3 (19 DPA) vs X4 (25 DPA) (FDR < 0.05). The top 30 enriched  
66 GO classifications are listed. Stars above bars indicate the amounts of differentially expressed  
67 genes are significantly higher or lower than the amounts of genes in random samples from the  
68 GO classification of all genes.

69 (e) The DEGs related to storage protein enriched molecular function in X3 (19 DPA) vs X4 (25  
70 DPA). The different color frames indicate the extent of significance. Yellow: significant; Red:  
71 extremely significant.

72

73

74

75

76

77

78

79

80

81

82

83

84

85

86

87

88

89

90

91

92 **Additional file Tables:**

**Table S1** Quality of the RNA sequencing data

| Sample name | Raw reads  | Clean reads | Clean bases | Error rate (%) | Q20(%) | Q30(%) | GC content (%) |
|-------------|------------|-------------|-------------|----------------|--------|--------|----------------|
| X2_1        | 57,667,990 | 55,636,848  | 8.35G       | 0.02           | 97.01  | 92.69  | 46.53          |
| X2_2        | 63,296,504 | 60,693,148  | 9.1G        | 0.02           | 96.72  | 92.2   | 47.6           |
| X2_3        | 51,869,420 | 50,731,030  | 7.61G       | 0.02           | 97.2   | 93.21  | 45.9           |
| X3_1        | 58,114,304 | 56,067,612  | 8.41G       | 0.02           | 96.66  | 92.13  | 49.21          |
| X3_2        | 60,541,944 | 57,761,526  | 8.66G       | 0.02           | 96.51  | 91.88  | 49.84          |
| X3_3        | 56,100,570 | 54,824,078  | 8.22G       | 0.02           | 96.61  | 92.13  | 48.79          |
| X4_1        | 59,984,306 | 57,627,070  | 8.64G       | 0.02           | 96.43  | 91.74  | 49.42          |
| X4_2        | 60,858,178 | 58,529,782  | 8.78G       | 0.02           | 96.53  | 91.84  | 49.31          |
| X4_3        | 60,420,760 | 58,925,604  | 8.84G       | 0.02           | 96.56  | 92.09  | 49.79          |

94

95

96

97

98

99

100

101

102

103

104

105

106

107

108

109

110

111

**Table S2** Information of reads aligned to the reference sequence

| Sample name | Total reads | Total mapped         | Multiple mapped    | Uniquely mapped      | Non-splice reads     | Splice reads         |
|-------------|-------------|----------------------|--------------------|----------------------|----------------------|----------------------|
| X2_1        | 55636848    | 51764090<br>(93.04%) | 1930613<br>(3.47%) | 49833477<br>(89.57%) | 31748015<br>(57.06%) | 18085462<br>(32.51%) |
| X2_2        | 60693148    | 56174531<br>(92.55%) | 2525111<br>(4.16%) | 53649420<br>(88.39%) | 34896700<br>(57.5%)  | 18752720<br>(30.9%)  |
| X2_3        | 50731030    | 46824320<br>(92.3%)  | 1497685<br>(2.95%) | 45326635<br>(89.35%) | 27836598<br>(54.87%) | 17490037<br>(34.48%) |
| X3_1        | 56067612    | 51667347<br>(92.15%) | 3901556<br>(6.96%) | 47765791<br>(85.19%) | 31741951<br>(56.61%) | 16023840<br>(28.58%) |
| X3_2        | 57761526    | 52901817<br>(91.59%) | 3919826<br>(6.79%) | 48981991<br>(84.8%)  | 34020967<br>(58.9%)  | 14961024<br>(25.9%)  |
| X3_3        | 54824078    | 50452533<br>(92.03%) | 3954895<br>(7.21%) | 46497638<br>(84.81%) | 30343350<br>(55.35%) | 16154288<br>(29.47%) |
| X4_1        | 57627070    | 52064699<br>(90.35%) | 4342596<br>(7.54%) | 47722103<br>(82.81%) | 32780130<br>(56.88%) | 14941973<br>(25.93%) |
| X4_2        | 58529782    | 53886743<br>(92.07%) | 4236381<br>(7.24%) | 49650362<br>(84.83%) | 34002356<br>(58.09%) | 15648006<br>(26.74%) |
| X4_3        | 58925604    | 53854623<br>(91.39%) | 4186267<br>(7.1%)  | 49668356<br>(84.29%) | 34557038<br>(58.65%) | 15111318<br>(25.64%) |

113

114

115

116

117

118

119

120

121

122

123

124

125

126

**Table S3** Pearson correlation between RNA-seq data from different samples

| R <sup>2</sup> | X2_1  | X2_2  | X2_3  | X3_1  | X3_2  | X3_3  | X4_1  | X4_2  | X4_3  |
|----------------|-------|-------|-------|-------|-------|-------|-------|-------|-------|
| X2_1           | 1     | 0.945 | 0.955 | 0.898 | 0.807 | 0.874 | 0.641 | 0.698 | 0.652 |
| X2_2           | 0.945 | 1     | 0.904 | 0.936 | 0.889 | 0.906 | 0.728 | 0.784 | 0.74  |
| X2_3           | 0.955 | 0.904 | 1     | 0.849 | 0.757 | 0.873 | 0.622 | 0.673 | 0.639 |
| X3_1           | 0.898 | 0.936 | 0.849 | 1     | 0.938 | 0.955 | 0.778 | 0.829 | 0.786 |
| X3_2           | 0.807 | 0.889 | 0.757 | 0.938 | 1     | 0.904 | 0.838 | 0.887 | 0.845 |
| X3_3           | 0.874 | 0.906 | 0.873 | 0.955 | 0.904 | 1     | 0.773 | 0.822 | 0.794 |
| X4_1           | 0.641 | 0.728 | 0.622 | 0.778 | 0.838 | 0.773 | 1     | 0.961 | 0.958 |
| X4_2           | 0.698 | 0.784 | 0.673 | 0.829 | 0.887 | 0.822 | 0.961 | 1     | 0.961 |
| X4_3           | 0.652 | 0.74  | 0.639 | 0.786 | 0.845 | 0.794 | 0.958 | 0.961 | 1     |

128

129

130

131

132

133

134

135

136

137

138

139

140

141

142

143

144

145

146

147

148

149



**Table S4** List of genes were related to phytohormones during seed development.

| Gene ID             | Related Hormone | Function category           | Family                                               | X2 fpkm     | X3 fpkm     | X4 fpkm     |
|---------------------|-----------------|-----------------------------|------------------------------------------------------|-------------|-------------|-------------|
| FtPinG0003501200.01 | auxin           | Hormone signal transduction | Aux/IAA family                                       | 10.87657171 | 5.591377013 | 6.132366513 |
| FtPinG0009172300.01 | auxin           | Hormone signal transduction | ARG7 family                                          | 0.209598055 | 0.061033937 | 0.030453959 |
| FtPinG0000418400.01 | auxin           | Hormone signal transduction | ARG7 family                                          | 0.221751047 | 0.172045728 | 0.099360845 |
| FtPinG0009166400.01 | auxin           | Hormone signal transduction | ARG7 family                                          | 0.378330683 | 0           | 0           |
| FtPinG0009170000.01 | auxin           | Hormone signal transduction | ARG7 family                                          | 0.828795767 | 0.249491265 | 0.029875198 |
| FtPinG0009167500.01 | auxin           | Hormone signal transduction | ARG7 family                                          | 2.399935389 | 0.135630132 | 0           |
| FtPinG0009168600.01 | auxin           | Hormone signal transduction | ARG7 family                                          | 0           | 0           | 0           |
| FtPinG0009169600.01 | auxin           | Hormone signal transduction | ARG7 family                                          | 5.582575197 | 0.615299977 | 0           |
| FtPinG0009170500.01 | auxin           | Hormone signal transduction | ARG7 family                                          | 0           | 0           | 0           |
| FtPinG0006689400.01 | gibberellin     | Hormone biosynthesis        | iron/ascorbate-dependent<br>oxidoreductase family    | 3.980492887 | 4.331099735 | 0.060697809 |
| FtPinG0006689500.01 | gibberellin     | Hormone biosynthesis        | iron/ascorbate-dependent<br>oxidoreductase family    | 8.563137844 | 10.93041837 | 1.240128394 |
| FtPinG0000344600.01 | gibberellin     | Hormone biosynthesis        | iron/ascorbate-dependent<br>oxidoreductase family    | 0.057631895 | 0.015402791 | 0           |
| FtPinG0004797700.01 | auxin           | Hormone signal transduction | ARG7 family                                          | 11.21869515 | 19.89318875 | 11.54381144 |
| FtPinG0000507900.01 | auxin           | Hormone signal transduction | ARG7 family                                          | 4.045828868 | 1.329497853 | 1.71885659  |
| FtPinG0000271800.01 | auxin           | Hormone signal transduction | ARG7 family                                          | 1.799019134 | 0.386658648 | 0.21841858  |
| FtPinG0005900800.01 | cytokinin       | Hormone metabolism          | oxygen-dependent FAD-linked<br>oxidoreductase family | 0.016855302 | 0           | 0.008944136 |
| FtPinG0003227500.01 | auxin           | Hormone signal transduction | Aux/IAA family                                       | 12.65977487 | 11.48602243 | 6.408427354 |
| FtPinG0007231100.01 | auxin           | Hormone signal transduction | Aux/IAA family                                       | 15.87680968 | 12.87033941 | 8.884561389 |
| FtPinG0004315700.01 | auxin           | Hormone signal transduction | Aux/IAA family                                       | 149.8830172 | 81.37146889 | 44.67748771 |
| FtPinG0009157200.01 | auxin           | Hormone signal transduction | Aux/IAA family                                       | 4.46971304  | 1.564672036 | 1.089589018 |
| FtPinG0002846500.01 | auxin           | Hormone signal transduction | Aux/IAA family                                       | 0.407381033 | 0.388560565 | 0.15959321  |
| FtPinG0006568700.01 | auxin           | Hormone signal transduction | Aux/IAA family                                       | 0.780242565 | 0.018132196 | 0           |
| FtPinG0007012600.01 | auxin           | Hormone signal transduction | Aux/IAA family                                       | 7.131864566 | 2.52881382  | 0.143579292 |
| FtPinG0001585700.01 | auxin           | Hormone signal transduction | Aux/IAA family                                       | 1.632540183 | 0.447116519 | 0.635813728 |
| FtPinG0001961200.01 | auxin           | Hormone signal transduction | Aux/IAA family                                       | 2.294012029 | 0.174221235 | 0           |
| FtPinG0003635500.01 | auxin           | Hormone signal transduction | Aux/IAA family                                       | 11.00201    | 7.872572667 | 1.151063733 |
| FtPinG0005535200.01 | auxin           | Hormone signal transduction | Aux/IAA family                                       | 3.166618105 | 0.250047142 | 0.133203879 |
| FtPinG0001338600.01 | auxin           | Hormone signal transduction | Aux/IAA family                                       | 8.844144446 | 0.863120879 | 0           |
| FtPinG0009866800.01 | auxin           | Hormone signal transduction | Aux/IAA family                                       | 0           | 0           | 0           |
| FtPinG0007581100.01 | auxin           | Hormone signal transduction | Aux/IAA family                                       | 0.834949983 | 0.196103447 | 0.406223725 |
| FtPinG0007414000.01 | auxin           | Hormone signal transduction | Aux/IAA family                                       | 84.59904568 | 27.73131948 | 17.42754829 |
| FtPinG0007560600.01 | gibberellin     | Hormone biosynthesis        | iron/ascorbate-dependent<br>oxidoreductase family    | 2.794776241 | 0.07857671  | 0           |
| FtPinG0009540700.01 | gibberellin     | Hormone biosynthesis        | iron/ascorbate-dependent<br>oxidoreductase family    | 5.894141351 | 6.871880515 | 11.51254111 |
| FtPinG0003233400.01 | gibberellin     | Hormone biosynthesis        | iron/ascorbate-dependent<br>oxidoreductase family    | 4.385205796 | 12.9933552  | 0.761198603 |

|                     |               |                             |                                                          |             |             |             |
|---------------------|---------------|-----------------------------|----------------------------------------------------------|-------------|-------------|-------------|
| FtPinG0008699300.01 | gibberellin   | Hormone biosynthesis        | iron/ascorbate-dependent oxidoreductase family           | 3.812595443 | 4.983516698 | 6.664104505 |
| FtPinG0007802700.01 | abscisic acid | Hormone receptor            | PYR/PYL/RCAR abscisic acid intracellular receptor family | 10.53954818 | 3.674223001 | 1.671600433 |
| FtPinG0008671800.01 | abscisic acid | Hormone receptor            | PYR/PYL/RCAR abscisic acid intracellular receptor family | 1.662643433 | 0.470524587 | 0.06116484  |
| FtPinG0008047400.01 | abscisic acid | Hormone receptor            | PYR/PYL/RCAR abscisic acid intracellular receptor family | 9.740739819 | 3.693294221 | 5.635242686 |
| FtPinG0004424000.01 | abscisic acid | Hormone receptor            | PYR/PYL/RCAR abscisic acid intracellular receptor family | 60.34733726 | 23.22613274 | 6.231696795 |
| FtPinG0002423800.01 | auxin         | Hormone signal transduction | ARG7 family                                              | 0.2300927   | 0.047829479 | 0.273596611 |
| FtPinG0003158800.01 | auxin         | Hormone signal transduction | ARG7 family                                              | 0.476226127 | 0.398278551 | 1.19731728  |
| FtPinG0004309500.01 | auxin         | Hormone signal transduction | ARG7 family                                              | 3.137250816 | 2.725331486 | 0.582469781 |
| FtPinG0006187800.01 | gibberellin   | Hormone signal transduction | GASA family                                              | 0.462353841 | 0.155196752 | 0.32835851  |
| FtPinG0006187600.01 | gibberellin   | Hormone signal transduction | GASA family                                              | 13.40573939 | 0.102270648 | 0.067759873 |
| FtPinG0007619900.01 | abscisic acid | Hormone receptor            | PYR/PYL/RCAR abscisic acid intracellular receptor family | 4.770937515 | 3.698850475 | 2.92939277  |
| FtPinG0002102600.01 | abscisic acid | Hormone receptor            | PYR/PYL/RCAR abscisic acid intracellular receptor family | 16.60378756 | 9.286983264 | 1.347357692 |
| FtPinG0005799600.01 | abscisic acid | Hormone receptor            | PYR/PYL/RCAR abscisic acid intracellular receptor family | 4.793605888 | 2.225287967 | 5.007113984 |
| FtPinG0000874700.01 | abscisic acid | Hormone receptor            | PYR/PYL/RCAR abscisic acid intracellular receptor family | 6.322537782 | 6.000768487 | 1.953425945 |
| FtPinG0008891400.01 | abscisic acid | Hormone receptor            | PYR/PYL/RCAR abscisic acid intracellular receptor family | 1.067529322 | 0.639446166 | 0.161577557 |
| FtPinG0001407600.01 | abscisic acid | Hormone receptor            | PYR/PYL/RCAR abscisic acid intracellular receptor family | 0.277528103 | 0.122877965 | 0.023873502 |
| FtPinG0002387400.01 | abscisic acid | Hormone metabolism          | cytochrome P450 family                                   | 6.708343507 | 11.79860449 | 33.42813458 |
| FtPinG0003175900.01 | abscisic acid | Hormone metabolism          | cytochrome P450 family                                   | 10.86337675 | 11.6477612  | 26.28104375 |
| FtPinG0005535900.01 | auxin         | Hormone transportion        | auxin efflux carrier (TC 2.A.69.1) family                | 0.080907444 | 0           | 0           |
| FtPinG0005142100.01 | auxin         | Hormone signal transduction | Aux/IAA family                                           | 1.882857141 | 0.258143407 | 0.057588734 |
| FtPinG0007967500.01 | auxin         | Hormone signal transduction | ARG7 family                                              | 0.084100171 | 0           | 0.221365138 |
| FtPinG0001622200.01 | auxin         | Hormone signal transduction | ARG7 family                                              | 0.180093295 | 0.19426963  | 0           |
| FtPinG0003215600.01 | auxin         | Hormone signal transduction | ARG7 family                                              | 3.83924177  | 5.37311375  | 2.182016285 |
| FtPinG0001096500.01 | auxin         | Hormone signal transduction | ARG7 family                                              | 0           | 0           | 0           |
| FtPinG0007968400.01 | auxin         | Hormone signal transduction | ARG7 family                                              | 0.27719799  | 0.041378684 | 0           |
| FtPinG0007966400.01 | auxin         | Hormone signal transduction | ARG7 family                                              | 6.166798469 | 2.070829217 | 0           |
| FtPinG0001397900.01 | auxin         | Hormone signal transduction | ARG7 family                                              | 20.06579142 | 4.977203249 | 0.48114854  |
| FtPinG0002434500.01 | auxin         | Hormone signal transduction | ARG7 family                                              | 0           | 0.052917722 | 0           |
| FtPinG0008444800.01 | auxin         | Hormone signal transduction | ARG7 family                                              | 0.463578764 | 0.119606584 | 0           |
| FtPinG0000807600.01 | auxin         | Hormone signal transduction | ARG7 family                                              | 4.644180029 | 2.805317993 | 3.86384912  |
| FtPinG0000765000.01 | auxin         | Hormone signal transduction | ARG7 family                                              | 2.052029455 | 0.769426091 | 0.076891904 |
| FtPinG0000909000.01 | auxin         | Hormone signal transduction | ARG7 family                                              | 0           | 0           | 0           |

|                     |             |                             |                                                   |             |             |             |
|---------------------|-------------|-----------------------------|---------------------------------------------------|-------------|-------------|-------------|
| FtPinG0001398200.01 | auxin       | Hormone signal transduction | ARG7 family                                       | 1.886405387 | 1.160870019 | 0           |
| FtPinG0009367500.01 | auxin       | Hormone signal transduction | ARG7 family                                       | 0.764600004 | 0.114379561 | 0.03627054  |
| FtPinG0005521900.01 | auxin       | Hormone receptor            | NA                                                | 5.961210464 | 3.979247876 | 2.577627668 |
| FtPinG0007264800.01 | auxin       | Hormone receptor            | NA                                                | 7.789059677 | 3.387215531 | 1.985086734 |
| FtPinG0006955500.01 | auxin       | Hormone receptor            | NA                                                | 30.68487247 | 37.70174452 | 64.02700082 |
| FtPinG0006188000.01 | gibberellin | Hormone signal transduction | GASA family                                       | 21.69803224 | 24.11764659 | 4.670413082 |
| FtPinG0002727000.01 | gibberellin | Hormone signal transduction | GASA family                                       | 263.5074507 | 150.9166194 | 117.8664347 |
| FtPinG0007503000.01 | gibberellin | Hormone signal transduction | GASA family                                       | 12.43454539 | 11.4833651  | 0.213963872 |
| FtPinG0006944700.01 | gibberellin | Hormone signal transduction | GASA family                                       | 3.043448289 | 3.767206255 | 0.105735682 |
| FtPinG0000807700.01 | auxin       | Hormone signal transduction | Aux/IAA family                                    | 4.24018152  | 1.71268214  | 0.474990247 |
| FtPinG0000764000.01 | auxin       | Hormone signal transduction | Aux/IAA family                                    | 12.67785312 | 3.277795417 | 4.381225172 |
| FtPinG0000814000.01 | auxin       | Hormone signal transduction | Aux/IAA family                                    | 0           | 0           | 0           |
| FtPinG0008443000.01 | auxin       | Hormone signal transduction | Aux/IAA family                                    | 4.263175276 | 0.938886554 | 0.034266715 |
| FtPinG0000464100.01 | auxin       | Hormone signal transduction | DRM1/ARP family                                   | 3986.415024 | 1015.819875 | 1893.725417 |
| FtPinG0006959800.01 | auxin       | Hormone signal transduction | Aux/IAA family                                    | 0.770376587 | 1.191839934 | 1.403618739 |
| FtPinG0009328100.01 | auxin       | Hormone signal transduction | Aux/IAA family                                    | 0.031502722 | 0.100100598 | 0           |
| FtPinG0009166900.01 | auxin       | Hormone signal transduction | ARG7 family                                       | 0           | 0           | 0           |
| FtPinG0009169000.01 | auxin       | Hormone signal transduction | ARG7 family                                       | 0.168989685 | 0           | 0           |
| FtPinG0009167900.01 | auxin       | Hormone signal transduction | ARG7 family                                       | 0.047585573 | 0.023685583 | 0           |
| FtPinG0009164500.01 | auxin       | Hormone signal transduction | ARG7 family                                       | 0.516505432 | 0.03233566  | 0           |
| FtPinG0009164300.01 | auxin       | Hormone signal transduction | ARG7 family                                       | 0.421883173 | 0.358901684 | 1.570283241 |
| FtPinG0009172200.01 | auxin       | Hormone signal transduction | ARG7 family                                       | 4.684605244 | 1.629187264 | 0.676417422 |
| FtPinG0005745300.01 | auxin       | Hormone signal transduction | Aux/IAA family                                    | 0.823686116 | 0.677205418 | 0.191503444 |
| FtPinG0008442000.01 | auxin       | Hormone signal transduction | Aux/IAA family                                    | 13.08816361 | 1.964478377 | 1.415761657 |
| FtPinG0000809900.01 | auxin       | Hormone signal transduction | Aux/IAA family                                    | 49.39191495 | 18.98787199 | 11.5579114  |
| FtPinG0009368700.01 | auxin       | Hormone signal transduction | Aux/IAA family                                    | 120.4628826 | 47.91497062 | 15.04652119 |
| FtPinG0007592600.01 | auxin       | Hormone signal transduction | Aux/IAA family                                    | 2.04151817  | 1.845041048 | 0.829267055 |
| FtPinG0008025900.01 | auxin       | Hormone signal transduction | Aux/IAA family                                    | 45.13976631 | 16.27887475 | 5.524432683 |
| FtPinG0007581000.01 | auxin       | Hormone signal transduction | Aux/IAA family                                    | 0.050424734 | 0           | 0           |
| FtPinG0007414500.01 | auxin       | Hormone signal transduction | Aux/IAA family                                    | 5.040388116 | 1.080208778 | 0.86949418  |
| FtPinG0002514700.01 | gibberellin | Hormone biosynthesis        | iron/ascorbate-dependent<br>oxidoreductase family | 10.64011993 | 20.18538513 | 0.215118003 |
| FtPinG0008198800.01 | gibberellin | Hormone biosynthesis        | iron/ascorbate-dependent<br>oxidoreductase family | 2.230466382 | 6.940918334 | 57.17657788 |
| FtPinG0005591800.01 | gibberellin | Hormone biosynthesis        | iron/ascorbate-dependent<br>oxidoreductase family | 2.571535215 | 0.995191161 | 0.304392489 |
| FtPinG0004385200.01 | gibberellin | Hormone biosynthesis        | iron/ascorbate-dependent<br>oxidoreductase family | 1.365804251 | 0.57774693  | 5.445488563 |
| FtPinG0008005100.01 | gibberellin | Hormone biosynthesis        | iron/ascorbate-dependent<br>oxidoreductase family | 0.035029365 | 0           | 0           |
| FtPinG0009397500.01 | gibberellin | Hormone biosynthesis        | iron/ascorbate-dependent<br>oxidoreductase family | 1.553731085 | 0.833723732 | 0.286402635 |
| FtPinG0007967400.01 | auxin       | Hormone signal transduction | ARG7 family                                       | 0.42471673  | 0           | 0           |
| FtPinG0007968800.01 | auxin       | Hormone signal transduction | ARG7 family                                       | 1.250781043 | 0.381629448 | 0           |

|                     |               |                             |                                                          |             |             |             |
|---------------------|---------------|-----------------------------|----------------------------------------------------------|-------------|-------------|-------------|
| FtPinG0004311700.01 | auxin         | Hormone transportion        | amino acid/polyamine transporter 2 family                | 0           | 0           | 0           |
| FtPinG0001567800.01 | auxin         | Hormone transportion        | auxin efflux carrier (TC 2.A.69.1) family                | 1.615402495 | 1.173096637 | 0.62236154  |
| FtPinG0009541700.01 | auxin         | Hormone transportion        | auxin efflux carrier (TC 2.A.69.1) family                | 11.32869361 | 4.04209925  | 0.635266638 |
| FtPinG0009310400.01 | auxin         | Hormone transportion        | auxin efflux carrier (TC 2.A.69.1) family                | 0.536173885 | 0.113202831 | 0.039931344 |
| FtPinG0005142700.01 | auxin         | Hormone signal transduction | Aux/IAA family                                           | 38.7095567  | 25.85445665 | 24.52697318 |
| FtPinG0003898400.01 | auxin         | Hormone signal transduction | Aux/IAA family                                           | 22.0792036  | 16.74697179 | 6.617401781 |
| FtPinG0005714900.01 | auxin         | Hormone signal transduction | Aux/IAA family                                           | 1.626601097 | 2.251144851 | 2.16619024  |
| FtPinG0002645500.01 | auxin         | Hormone signal transduction | Aux/IAA family                                           | 7.271270825 | 5.288332216 | 5.428010126 |
| FtPinG0000437300.01 | auxin         | Hormone transportion        | auxin efflux carrier (TC 2.A.69.1) family                | 7.771282991 | 3.007503549 | 1.127952779 |
| FtPinG0006941400.01 | auxin         | Hormone transportion        | auxin efflux carrier (TC 2.A.69.1) family                | 2.848346005 | 1.313839214 | 0.287798119 |
| FtPinG0002134900.01 | cytokinin     | Hormone metabolism          | oxygen-dependent FAD-linked oxidoreductase family        | 0.19483645  | 0.008935807 | 0           |
| FtPinG0005613800.01 | cytokinin     | Hormone metabolism          | oxygen-dependent FAD-linked oxidoreductase family        | 7.194924807 | 7.93101844  | 6.326682535 |
| FtPinG0002075100.01 | gibberellin   | Hormone response            | GRAS family                                              | 65.13253288 | 15.47588532 | 15.34979115 |
| FtPinG0007899500.01 | gibberellin   | Hormone response            | GRAS family                                              | 1.953996319 | 1.229839299 | 1.021018131 |
| FtPinG0007899800.01 | gibberellin   | Hormone response            | GRAS family                                              | 2.724043434 | 1.931748865 | 1.331439001 |
| FtPinG0001971700.01 | auxin         | Hormone signal transduction | Aux/IAA family                                           | 20.5471059  | 12.88599884 | 16.49777708 |
| FtPinG0009169200.01 | auxin         | Hormone signal transduction | ARG7 family                                              | 2.297787962 | 0.328068276 | 0.031269374 |
| FtPinG0009165100.01 | auxin         | Hormone signal transduction | ARG7 family                                              | 0.902660588 | 0.264230608 | 0           |
| FtPinG0000419200.01 | auxin         | Hormone signal transduction | ARG7 family                                              | 1.786688655 | 1.023547226 | 0.067579037 |
| FtPinG0009169300.01 | auxin         | Hormone signal transduction | ARG7 family                                              | 3.362707646 | 0.2350008   | 0           |
| FtPinG0009164800.01 | auxin         | Hormone signal transduction | ARG7 family                                              | 12.70407448 | 10.48226702 | 15.24643671 |
| FtPinG0009169800.01 | auxin         | Hormone signal transduction | ARG7 family                                              | 0.111254078 | 0           | 0           |
| FtPinG0009166700.01 | auxin         | Hormone signal transduction | ARG7 family                                              | 0.390961381 | 0.068451046 | 0           |
| FtPinG0009170400.01 | auxin         | Hormone signal transduction | ARG7 family                                              | 0.029741279 | 0.032092038 | 0           |
| FtPinG0006350100.01 | gibberellin   | Hormone signal transduction | GASA family                                              | 598.4179449 | 220.2092626 | 26.43382362 |
| FtPinG0006417500.01 | gibberellin   | Hormone signal transduction | GASA family                                              | 31.38224256 | 4.945725403 | 0.167483954 |
| FtPinG0008597200.01 | auxin         | Hormone signal transduction | Aux/IAA family                                           | 2.188136148 | 1.182322843 | 0.887611531 |
| FtPinG0005201900.01 | auxin         | Hormone signal transduction | Aux/IAA family                                           | 26.69772306 | 10.52058063 | 6.655092891 |
| FtPinG0005201700.01 | auxin         | Hormone signal transduction | Aux/IAA family                                           | 12.76621549 | 4.265258104 | 2.790231161 |
| FtPinG0004139100.01 | cytokinin     | Hormone biosynthesis        | LOG family                                               | 9.822419335 | 5.803127437 | 3.998483281 |
| FtPinG0007342200.01 | cytokinin     | Hormone biosynthesis        | LOG family                                               | 15.2087386  | 8.343103658 | 7.672161234 |
| FtPinG0002585600.01 | abscisic acid | Hormone receptor            | PYR/PYL/RCAR abscisic acid intracellular receptor family | 36.77112498 | 12.52772365 | 6.570736821 |
| FtPinG0005265100.01 | abscisic acid | Hormone receptor            | PYR/PYL/RCAR abscisic acid intracellular receptor family | 11.32731224 | 5.754649983 | 2.890958213 |
| FtPinG0001942600.01 | auxin         | Hormone signal transduction | Aux/IAA family                                           | 0.917284845 | 0.215017886 | 0.037225446 |

|                     |               |                             |                                                             |             |             |             |
|---------------------|---------------|-----------------------------|-------------------------------------------------------------|-------------|-------------|-------------|
| FtPinG0000343000.01 | auxin         | Hormone signal transduction | Aux/IAA family                                              | 21.87732928 | 13.55063048 | 8.704252769 |
| FtPinG0002610200.01 | auxin         | Hormone signal transduction | Aux/IAA family                                              | 14.54064946 | 4.104343824 | 1.560557329 |
| FtPinG0008603100.01 | cytokinin     | Hormone biosynthesis        | LOG family                                                  | 1.009683697 | 0.134903521 | 0.453723421 |
| FtPinG0007288900.01 | cytokinin     | Hormone biosynthesis        | LOG family                                                  | 14.13962254 | 15.88338795 | 6.855083415 |
| FtPinG0001266800.01 | cytokinin     | Hormone biosynthesis        | LOG family                                                  | 3.281628315 | 6.460273171 | 18.05112929 |
| FtPinG0006919600.01 | gibberellin   | Hormone signal transduction | GASA family                                                 | 74.035667   | 8.693631313 | 0.433217119 |
| FtPinG0001577700.01 | auxin         | Hormone signal transduction | Aux/IAA family                                              | 10.14269196 | 26.02980159 | 7.811725015 |
| FtPinG0002311400.01 | abscisic acid | Hormone receptor            | PYR/PYL/RCAR abscisic acid<br>intracellular receptor family | 0.641571415 | 0.591749935 | 3.843635492 |
| FtPinG0009506900.01 | auxin         | Hormone signal transduction | Aux/IAA family                                              | 52.63894492 | 26.41272866 | 21.29164423 |
| FtPinG0002025600.01 | cytokinin     | Hormone biosynthesis        | LOG family                                                  | 0.34863507  | 0.144801292 | 0.055498084 |
| FtPinG0005927100.01 | cytokinin     | Hormone biosynthesis        | LOG family                                                  | 0.950519543 | 0.591516879 | 0.13247433  |
| FtPinG0003898800.01 | cytokinin     | Hormone biosynthesis        | LOG family                                                  | 2.77133568  | 1.143195932 | 0.169985585 |
| FtPinG0002984800.01 | auxin         | Hormone signal transduction | Aux/IAA family                                              | 26.18979098 | 13.58115298 | 13.85030023 |
| FtPinG0004530400.01 | auxin         | Hormone signal transduction | Aux/IAA family                                              | 0.594465959 | 0.066961404 | 0.09786756  |
| FtPinG0007273100.01 | auxin         | Hormone signal transduction | Aux/IAA family                                              | 2.304363678 | 2.858794768 | 3.664297832 |
| FtPinG0003486500.01 | cytokinin     | Hormone biosynthesis        | LOG family                                                  | 0.883378876 | 0.235338637 | 0.194341807 |
| FtPinG0009006700.01 | cytokinin     | Hormone biosynthesis        | LOG family                                                  | 0.531501807 | 0           | 0.060343594 |
| FtPinG0000536000.01 | auxin         | Hormone signal transduction | Aux/IAA family                                              | 0.393233609 | 0           | 0           |
| FtPinG0000683600.01 | auxin         | Hormone signal transduction | Aux/IAA family                                              | 27.61570798 | 8.42439157  | 3.253176883 |
| FtPinG0003500800.01 | auxin         | Hormone signal transduction | Aux/IAA family                                              | 14.25974503 | 8.78172547  | 10.03986197 |
| FtPinG0003501400.01 | auxin         | Hormone signal transduction | Aux/IAA family                                              | 6.754781824 | 3.20105742  | 3.175726536 |
| FtPinG0002445200.01 | abscisic acid | Hormone receptor            | PYR/PYL/RCAR abscisic acid<br>intracellular receptor family | 0.755946391 | 0.925971647 | 0.789828282 |
| FtPinG0004588200.01 | gibberellin   | Hormone receptor            | 'GDXG' lipolytic enzyme family                              | 40.69748249 | 15.3625749  | 15.36089643 |
| FtPinG0009034000.01 | abscisic acid | Hormone metabolism          | cytochrome P450 family                                      | 0.088149922 | 0.187315225 | 0.328516882 |
| FtPinG0004478100.01 | auxin         | Hormone signal transduction | NA                                                          | 5.826257051 | 1.852128477 | 0.725078331 |
| FtPinG0003566300.01 | auxin         | Hormone signal transduction | NA                                                          | 19.89803005 | 20.53384205 | 3.12265434  |
| FtPinG0002624600.01 | auxin         | Hormone signal transduction | NA                                                          | 1.121969892 | 1.191412692 | 0.450210774 |
| FtPinG0002469700.01 | auxin         | Hormone signal transduction | Aux/IAA family                                              | 29.09579493 | 14.01585713 | 11.27409353 |
| FtPinG0005575800.01 | auxin         | Hormone signal transduction | Aux/IAA family                                              | 81.0331684  | 28.09909973 | 17.12383403 |
| FtPinG0009165500.01 | auxin         | Hormone signal transduction | ARG7 family                                                 | 0           | 0           | 0           |
| FtPinG0009165400.01 | auxin         | Hormone signal transduction | ARG7 family                                                 | 0           | 0           | 0           |
| FtPinG0009163900.01 | auxin         | Hormone signal transduction | ARG7 family                                                 | 0.971403437 | 0.398526764 | 0.208931897 |
| FtPinG0009163500.01 | auxin         | Hormone signal transduction | ARG7 family                                                 | 0.328669629 | 0.167340696 | 0.032435034 |
| FtPinG0009167700.01 | auxin         | Hormone signal transduction | ARG7 family                                                 | 1.319128374 | 0.132583244 | 0           |
| FtPinG0009164900.01 | auxin         | Hormone signal transduction | ARG7 family                                                 | 0           | 0           | 0           |
| FtPinG0009171800.01 | auxin         | Hormone signal transduction | ARG7 family                                                 | 0.115801421 | 0           | 0           |
| FtPinG0009167300.01 | auxin         | Hormone signal transduction | ARG7 family                                                 | 1.303011333 | 0.111817208 | 0           |
| FtPinG0009171400.01 | auxin         | Hormone signal transduction | ARG7 family                                                 | 0           | 0           | 0           |
| FtPinG0006908400.01 | auxin         | Hormone transportion        | amino acid/polyamine transporter 2<br>family                | 49.75627658 | 4.480345984 | 0.225637095 |
| FtPinG0003888700.01 | auxin         | Hormone transportion        | amino acid/polyamine transporter 2<br>family                | 19.17579691 | 3.732455437 | 2.523907063 |

|                     |               |                             |                                                          |             |             |             |
|---------------------|---------------|-----------------------------|----------------------------------------------------------|-------------|-------------|-------------|
| FtPinG0004311300.01 | auxin         | Hormone transportion        | amino acid/polyamine transporter 2 family                | 3.615070287 | 0.809430426 | 0.576991366 |
| FtPinG0006532300.01 | auxin         | Hormone transportion        | amino acid/polyamine transporter 2 family                | 4.044084277 | 3.358311186 | 4.760408882 |
| FtPinG0005765500.01 | auxin         | Hormone transportion        | amino acid/polyamine transporter 2 family                | 90.2986145  | 69.29121839 | 89.26665155 |
| FtPinG0007484100.01 | cytokinin     | Hormone biosynthesis        | cytochrome P450 family                                   | 0           | 0           | 0           |
| FtPinG0007828000.01 | cytokinin     | Hormone biosynthesis        | cytochrome P450 family                                   | 0.298692243 | 0           | 0           |
| FtPinG0003093300.01 | auxin         | Hormone transportion        | auxin efflux carrier (TC 2.A.69.1) family                | 0.158182189 | 0.195534985 | 0.07524928  |
| FtPinG0005001000.01 | auxin         | Hormone transportion        | auxin efflux carrier (TC 2.A.69.1) family                | 0.022671631 | 0           | 0           |
| FtPinG0004913500.01 | auxin         | Hormone transportion        | auxin efflux carrier (TC 2.A.69.1) family                | 5.022181466 | 7.015916014 | 1.06435871  |
| FtPinG0007479900.01 | auxin         | Hormone transportion        | auxin efflux carrier (TC 2.A.69.1) family                | 0           | 0           | 0           |
| FtPinG0001214600.01 | abscisic acid | Hormone receptor            | PYR/PYL/RCAR abscisic acid intracellular receptor family | 79.59006688 | 40.30912738 | 11.135144   |
| FtPinG0005737100.01 | auxin         | Hormone signal transduction | Aux/IAA family                                           | 21.08179056 | 6.660483404 | 2.988411791 |
| FtPinG0005737300.01 | auxin         | Hormone signal transduction | Aux/IAA family                                           | 40.64362244 | 12.78135583 | 5.920377769 |
| FtPinG0004636500.01 | auxin         | Hormone signal transduction | Aux/IAA family                                           | 15.59065292 | 5.576533647 | 8.596930777 |
| FtPinG0004462100.01 | abscisic acid | Hormone metabolism          | cytochrome P450 family                                   | 52.77529124 | 3.388359326 | 4.302804152 |
| FtPinG0001623000.01 | auxin         | Hormone signal transduction | ARG7 family                                              | 0.602575563 | 1.010200587 | 1.997765584 |
| FtPinG0001623200.01 | auxin         | Hormone signal transduction | ARG7 family                                              | 0.246229889 | 0           | 0           |
| FtPinG0007969000.01 | auxin         | Hormone signal transduction | ARG7 family                                              | 2.174381214 | 0.249264141 | 0           |
| FtPinG0007968100.01 | auxin         | Hormone signal transduction | ARG7 family                                              | 7.135062734 | 1.999268103 | 0.042255911 |
| FtPinG0001621800.01 | auxin         | Hormone signal transduction | ARG7 family                                              | 0.205430107 | 0.252953425 | 0.211288224 |
| FtPinG0001621900.01 | auxin         | Hormone signal transduction | ARG7 family                                              | 2.992186884 | 0.568680385 | 0           |
| FtPinG0002508600.01 | auxin         | Hormone signal transduction | Aux/IAA family                                           | 0.892915301 | 0.481120576 | 0.323675413 |
| FtPinG0003101700.01 | cytokinin     | Hormone metabolism          | oxygen-dependent FAD-linked oxidoreductase family        | 14.67303667 | 6.030512419 | 3.040411466 |
| FtPinG0004375600.01 | auxin         | Hormone transportion        | NA                                                       | 21.53232422 | 9.019908015 | 3.612217758 |
| FtPinG0003072700.01 | abscisic acid | Hormone signal transduction | bZIP family                                              | 0.401806567 | 0.15551333  | 0.237237915 |
| FtPinG0002063700.01 | abscisic acid | Hormone signal transduction | bZIP family                                              | 5.420195721 | 3.3578717   | 0.263233989 |
| FtPinG0009718300.01 | abscisic acid | Hormone signal transduction | bZIP family                                              | 3.902089939 | 2.155713688 | 1.274747909 |
| FtPinG0008174200.01 | abscisic acid | Hormone signal transduction | bZIP family                                              | 15.93703638 | 14.35744758 | 2.374686328 |
| FtPinG0006458700.01 | abscisic acid | Hormone signal transduction | bZIP family                                              | 14.86759975 | 18.09813167 | 26.57380624 |
| FtPinG0007855800.01 | gibberellin   | Hormone signal transduction | GASA family                                              | 32.22946024 | 45.42557803 | 91.96956411 |
| FtPinG0002378800.01 | abscisic acid | Hormone metabolism          | cytochrome P450 family                                   | 1.419267665 | 0.938798717 | 0.247596499 |
| FtPinG0003013300.01 | abscisic acid | Hormone metabolism          | cytochrome P450 family                                   | 5.440399773 | 2.449426093 | 1.699499025 |
| FtPinG0003196900.01 | abscisic acid | Hormone metabolism          | cytochrome P450 family                                   | 6.314648715 | 3.266957442 | 2.301156508 |
| FtPinG0003614600.01 | abscisic acid | Hormone metabolism          | cytochrome P450 family                                   | 6.413476375 | 2.712269057 | 0.134004571 |
| FtPinG0008345600.01 | cytokinin     | Hormone metabolism          | oxygen-dependent FAD-linked oxidoreductase family        | 10.82997621 | 5.348346792 | 1.913373534 |

|                     |               |                             |                                                      |             |             |             |
|---------------------|---------------|-----------------------------|------------------------------------------------------|-------------|-------------|-------------|
| FtPinG0005727300.01 | auxin         | Hormone signal transduction | ARG7 family                                          | 0.196583704 | 0.347992783 | 0.194892823 |
| FtPinG0005124800.01 | auxin         | Hormone signal transduction | ARG7 family                                          | 0.128389143 | 0           | 0           |
| FtPinG0005727600.01 | auxin         | Hormone signal transduction | ARG7 family                                          | 0           | 0           | 0           |
| FtPinG0002423200.01 | auxin         | Hormone signal transduction | ARG7 family                                          | 0.140093755 | 0           | 0.18128775  |
| FtPinG0007132900.01 | auxin         | Hormone transporition       | auxin efflux carrier (TC 2.A.69.1)<br>family         | 0.494532225 | 1.081663429 | 1.141349882 |
| FtPinG0001537500.01 | cytokinin     | Hormone metabolism          | oxygen-dependent FAD-linked<br>oxidoreductase family | 1.941162598 | 1.433864029 | 2.090959079 |
| FtPinG0005658800.01 | cytokinin     | Hormone metabolism          | oxygen-dependent FAD-linked<br>oxidoreductase family | 0.995251438 | 0.937495133 | 0.065545458 |
| FtPinG0005053900.01 | gibberellin   | Hormone receptor            | 'GDXG' lipolytic enzyme family                       | 21.14651605 | 15.0733684  | 13.2303805  |
| FtPinG0007990400.01 | gibberellin   | Hormone receptor            | 'GDXG' lipolytic enzyme family                       | 20.93306114 | 8.32169543  | 5.580790573 |
| FtPinG0006952100.01 | gibberellin   | Hormone receptor            | 'GDXG' lipolytic enzyme family                       | 10.68008894 | 1.314417569 | 0.631179864 |
| FtPinG0002143600.01 | abscisic acid | Hormone signal transduction | bZIP family                                          | 29.19396229 | 4.257546684 | 0.639857061 |
| FtPinG0009765500.01 | abscisic acid | Hormone signal transduction | bZIP family                                          | 17.02964704 | 8.363920222 | 2.776050991 |
| FtPinG0001379200.01 | abscisic acid | Hormone signal transduction | bZIP family                                          | 24.10759337 | 17.53864105 | 0.100644494 |
| FtPinG0003012600.01 | abscisic acid | Hormone signal transduction | bZIP family                                          | 15.50835408 | 11.25496959 | 26.72565309 |
| FtPinG0003196200.01 | abscisic acid | Hormone signal transduction | bZIP family                                          | 10.49802894 | 17.89273521 | 67.94908992 |
| FtPinG0007662200.01 | auxin         | Hormone transporition       | auxin efflux carrier (TC 2.A.69.1)<br>family         | 0.437887683 | 0.094906411 | 0.036410003 |
| FtPinG0009346000.01 | auxin         | Hormone transporition       | auxin efflux carrier (TC 2.A.69.1)<br>family         | 9.136154526 | 3.914110181 | 3.525818324 |
| FtPinG0009310600.01 | auxin         | Hormone transporition       | auxin efflux carrier (TC 2.A.69.1)<br>family         | 0           | 0           | 0           |
| FtPinG0007643300.01 | auxin         | Hormone transporition       | amino acid/polyamine transporter 2<br>family         | 10.06562593 | 1.758528382 | 0.299743126 |
| FtPinG0007044300.01 | auxin         | Hormone signal transduction | ARG7 family                                          | 0.096875266 | 0.17326591  | 0.438539495 |
| FtPinG0002808700.01 | auxin         | Hormone signal transduction | ARG7 family                                          | 22.84968022 | 23.11425614 | 26.36644646 |
| FtPinG0000908700.01 | auxin         | Hormone signal transduction | ARG7 family                                          | 0.027297151 | 0           | 0           |
| FtPinG0002403100.01 | auxin         | Hormone signal transduction | ARG7 family                                          | 0           | 0.025990126 | 0           |
| FtPinG0007172700.01 | auxin         | Hormone signal transduction | ARG7 family                                          | 0.995323726 | 5.322621677 | 2.679213871 |
| FtPinG0003159200.01 | auxin         | Hormone signal transduction | ARG7 family                                          | 0.172921531 | 0.878290912 | 0.036643798 |
| FtPinG0008563700.01 | auxin         | Hormone signal transduction | ARG7 family                                          | 0           | 0           | 0           |
| FtPinG0001657300.01 | auxin         | Hormone signal transduction | ARG7 family                                          | 0           | 0.036703613 | 0           |
| FtPinG0008667300.01 | auxin         | Hormone signal transduction | ARG7 family                                          | 0           | 0           | 0           |
| FtPinG0007504400.01 | auxin         | Hormone signal transduction | ARG7 family                                          | 0.429759075 | 0.25920045  | 0.725413876 |
| FtPinG0003159000.01 | auxin         | Hormone signal transduction | ARG7 family                                          | 9.490126073 | 7.743071719 | 5.859976308 |
| FtPinG0002465500.01 | auxin         | Hormone signal transduction | ARG7 family                                          | 0           | 0           | 0           |
| FtPinG0003523300.01 | abscisic acid | Hormone signal transduction | bZIP family                                          | 28.43375008 | 65.40430468 | 162.9254378 |
| FtPinG0000249600.01 | gibberellin   | Hormone biosynthesis        | iron/ascorbate-dependent<br>oxidoreductase family    | 39.16192323 | 20.68848287 | 27.93482637 |
| FtPinG0007406000.01 | gibberellin   | Hormone biosynthesis        | iron/ascorbate-dependent<br>oxidoreductase family    | 12.03949851 | 6.001086222 | 58.5042227  |
| FtPinG0005537400.01 | auxin         | Hormone signal transduction | UBR4 family                                          | 14.71236778 | 8.445230159 | 7.251596288 |

|                     |               |                             |                                                          |             |             |             |
|---------------------|---------------|-----------------------------|----------------------------------------------------------|-------------|-------------|-------------|
| FtPinG0005537600.01 | auxin         | Hormone signal transduction | UBR4 family                                              | 3.052451129 | 1.978731886 | 0.154901229 |
| FtPinG0001799400.01 | abscisic acid | Hormone receptor            | PYR/PYL/RCAR abscisic acid intracellular receptor family | 14.74442759 | 15.85266421 | 5.297746207 |
| FtPinG0008597700.01 | auxin         | Hormone signal transduction | Aux/IAA family                                           | 36.7422984  | 41.92382883 | 75.65326958 |
| FtPinG0002330600.01 | gibberellin   | Hormone biosynthesis        | iron/ascorbate-dependent oxidoreductase family           | 0.606954286 | 2.234854474 | 0.937254048 |
| FtPinG0006464400.01 | gibberellin   | Hormone biosynthesis        | iron/ascorbate-dependent oxidoreductase family           | 0           | 0           | 0.052653484 |
| FtPinG0005929600.01 | gibberellin   | Hormone biosynthesis        | iron/ascorbate-dependent oxidoreductase family           | 0.072809066 | 0.113145048 | 0.281571415 |
| FtPinG0000400800.01 | gibberellin   | Hormone biosynthesis        | iron/ascorbate-dependent oxidoreductase family           | 0.085644557 | 0.039435262 | 0.038340615 |
| FtPinG0009147800.01 | gibberellin   | Hormone biosynthesis        | iron/ascorbate-dependent oxidoreductase family           | 0           | 0           | 0           |
| FtPinG0000387700.01 | auxin         | Hormone signal transduction | Aux/IAA family                                           | 15.7810233  | 12.65622136 | 28.43500408 |
| FtPinG0001741700.01 | auxin         | Hormone signal transduction | Aux/IAA family                                           | 34.26929913 | 19.37470096 | 22.59248466 |
| FtPinG0002591700.01 | auxin         | Hormone signal transduction | Aux/IAA family                                           | 29.11174521 | 8.948655388 | 10.25872118 |
| FtPinG0008266700.01 | auxin         | Hormone receptor            | germin family                                            | 59.59093143 | 8.800831325 | 0.473339837 |
| FtPinG0005922500.01 | auxin         | Hormone receptor            | germin family                                            | 1.914848815 | 0.271810065 | 0           |
| FtPinG0005029300.01 | auxin         | Hormone signal transduction | Aux/IAA family                                           | 15.45897662 | 6.080765125 | 1.338302781 |
| FtPinG0002499600.01 | auxin         | Hormone signal transduction | Aux/IAA family                                           | 14.94576494 | 3.838702815 | 0.62278962  |
| FtPinG0000840000.01 | auxin         | Hormone signal transduction | Aux/IAA family                                           | 27.71730892 | 12.56428161 | 11.819527   |
| FtPinG0003331700.01 | auxin         | Hormone signal transduction | Aux/IAA family                                           | 27.90685361 | 19.97732232 | 2.263872647 |
| FtPinG0004040700.01 | auxin         | Hormone signal transduction | Aux/IAA family                                           | 8.257506759 | 2.949521296 | 1.117617853 |
| FtPinG0006935800.01 | auxin         | Hormone signal transduction | ARG7 family                                              | 1.996254329 | 0.338814471 | 0.376811821 |
| FtPinG0002594300.01 | auxin         | Hormone signal transduction | ARG7 family                                              | 123.8087971 | 119.1572716 | 23.07200127 |
| FtPinG0004378100.01 | auxin         | Hormone signal transduction | ARG7 family                                              | 29.20351075 | 51.26464217 | 8.96800298  |
| FtPinG0001589600.01 | auxin         | Hormone signal transduction | ARG7 family                                              | 59.26996807 | 24.37239161 | 19.44738562 |
| FtPinG0002363800.01 | auxin         | Hormone signal transduction | ARG7 family                                              | 71.85674096 | 139.5890649 | 88.76974528 |
| FtPinG0008308300.01 | cytokinin     | Hormone biosynthesis        | cytochrome P450 family                                   | 1.331980909 | 2.136398633 | 0.082684299 |
| Novel00946          | auxin         | Hormone receptor            | NA                                                       | 10.82226382 | 4.579957561 | 2.627875482 |
| Novel01990          | auxin         | Hormone signal transduction | Aux/IAA family                                           | 7.313016883 | 4.646133445 | 5.124606678 |
| Novel01557          | auxin         | Hormone signal transduction | Aux/IAA family                                           | 0.020867657 | 0.040920418 | 0           |
| Novel02020          | auxin         | Hormone signal transduction | Aux/IAA family                                           | 11.44922251 | 14.82044618 | 15.83512033 |
| Novel01693          | auxin         | Hormone signal transduction | Aux/IAA family                                           | 3.174671093 | 1.729209443 | 1.410115873 |
| Novel00986          | auxin         | Hormone signal transduction | UBR4 family                                              | 1.701528551 | 1.1327087   | 1.085303326 |

151

152

153

154

155



**Table S5** List of genes were related to flavonoid during seed development.

| Gene ID             | Related | Function category             | Family                                            | X2 fpkm  | X3 fpkm  | X4 fpkm  |
|---------------------|---------|-------------------------------|---------------------------------------------------|----------|----------|----------|
| FtPinG0003900700.01 | PAL     | Phenylpropanoid<br>metabolism | PAL/histidase family                              | 76.28942 | 29.19908 | 10.02819 |
| FtPinG0008236900.01 | PAL     | Phenylpropanoid<br>metabolism | PAL/histidase family                              | 61.09623 | 93.32882 | 49.74058 |
| FtPinG0008237100.01 | PAL     | Phenylpropanoid<br>metabolism | PAL/histidase family                              | 7.947951 | 3.047234 | 1.390171 |
| FtPinG0008741700.01 | CHS     | Flavonoid biosynthesis        | chalcone/stilbene<br>synthases family             | 0        | 0        | 0        |
| FtPinG0002106500.01 | CHS     | Flavonoid biosynthesis        | chalcone/stilbene<br>synthases family             | 0.346682 | 0.440283 | 0.603202 |
| FtPinG0008131000.01 | CHS     | Flavonoid biosynthesis        | chalcone/stilbene<br>synthases family             | 200.6596 | 265.0281 | 24.32931 |
| FtPinG0008806400.01 | CHS     | Flavonoid biosynthesis        | chalcone/stilbene<br>synthases family             | 107.7812 | 88.55083 | 19.0516  |
| FtPinG0002790600.01 | CHI     | Flavonoid biosynthesis        | chalcone isomerase<br>family                      | 65.46905 | 50.18828 | 7.609164 |
| FtPinG0008145300.01 | CHI     | Flavonoid biosynthesis        | chalcone isomerase<br>family                      | 0.184093 | 0.058521 | 0.038933 |
| FtPinG0001742500.01 | FLS     | Flavonoid biosynthesis        | iron/ascorbate-dependent<br>oxidoreductase family | 0        | 0        | 0        |
| FtPinG0006907100.01 | FLS     | Flavonoid biosynthesis        | iron/ascorbate-dependent<br>oxidoreductase family | 335.0774 | 389.0795 | 77.87107 |
| FtPinG0004192700.01 | FLS     | Flavonoid biosynthesis        | iron/ascorbate-dependent<br>oxidoreductase family | 0.73719  | 0.691101 | 0.146988 |
| FtPinG0001742000.01 | FLS     | Flavonoid biosynthesis        | iron/ascorbate-dependent<br>oxidoreductase family | 0.287567 | 0.104861 | 1.572384 |
| FtPinG0001318800.01 | FLS     | Flavonoid biosynthesis        | iron/ascorbate-dependent                          | 7.889077 | 5.01474  | 0.471684 |

|                     |                                                  |                          |                          |          |          |          |
|---------------------|--------------------------------------------------|--------------------------|--------------------------|----------|----------|----------|
|                     |                                                  |                          | oxidoreductase family    |          |          |          |
|                     |                                                  |                          | iron/ascorbate-dependent |          |          |          |
| FtPinG0001317600.01 | FLS                                              | Flavonoid biosynthesis   | oxidoreductase family    | 0        | 0        | 0        |
|                     |                                                  |                          | iron/ascorbate-dependent |          |          |          |
| FtPinG0006907000.01 | FLS                                              | Flavonoid biosynthesis   | oxidoreductase family    | 38.57619 | 18.90718 | 2.625413 |
|                     |                                                  |                          | iron/ascorbate-dependent |          |          |          |
| FtPinG0008448800.01 | FLS                                              | Flavonoid biosynthesis   | oxidoreductase family    | 0.950497 | 4.239906 | 2.541538 |
|                     |                                                  |                          | cytochrome P450 family   |          |          |          |
| FtPinG0003632300.01 | Flavonoid 3',5'-hydroxylase                      | anthocyanin biosynthesis | cytochrome P450 family   | 0        | 0.048827 | 0.193342 |
|                     |                                                  |                          | cytochrome P450 family   |          |          |          |
| FtPinG0003628700.01 | Flavonoid 3',5'-hydroxylase                      | anthocyanin biosynthesis | cytochrome P450 family   | 0.402304 | 0        | 0        |
|                     |                                                  |                          | cytochrome P450 family   |          |          |          |
| FtPinG0003631500.01 | Flavonoid 3',5'-hydroxylase                      | anthocyanin biosynthesis | cytochrome P450 family   | 0        | 0        | 0        |
|                     |                                                  |                          | cytochrome P450 family   |          |          |          |
| FtPinG0006940000.01 | Flavonoid 3',5'-hydroxylase                      | anthocyanin biosynthesis | cytochrome P450 family   | 14.74328 | 14.16386 | 4.213059 |
|                     |                                                  |                          | cytochrome P450 family   |          |          |          |
| FtPinG0003628500.01 | Flavonoid 3',5'-hydroxylase                      | anthocyanin biosynthesis | cytochrome P450 family   | 3.364915 | 1.557404 | 0.094356 |
|                     |                                                  |                          | UDP-glycosyltransferase  |          |          |          |
| FtPinG0007326600.01 | UDP-glucose flavonoid<br>3-O-glucosyltransferase | metabolic process        | family                   | 0.745266 | 2.188527 | 3.302759 |
|                     |                                                  |                          | UDP-glycosyltransferase  |          |          |          |
| FtPinG0001031900.01 | UDP-glucose flavonoid<br>3-O-glucosyltransferase | metabolic process        | family                   | 2.927817 | 2.598172 | 8.87172  |
|                     |                                                  |                          | UDP-glycosyltransferase  |          |          |          |
| FtPinG0003187300.01 | UDP-glucose flavonoid<br>3-O-glucosyltransferase | metabolic process        | family                   | 3.658782 | 3.775185 | 22.16688 |
|                     |                                                  |                          | UDP-glycosyltransferase  |          |          |          |
| FtPinG0001031700.01 | UDP-glucose flavonoid<br>3-O-glucosyltransferase | metabolic process        | family                   | 34.4875  | 42.37771 | 74.83619 |
|                     |                                                  |                          | UDP-glycosyltransferase  |          |          |          |
| FtPinG0003584500.01 | UDP-glucose flavonoid<br>3-O-glucosyltransferase | metabolic process        | family                   | 5.376592 | 4.342541 | 0.703926 |
|                     |                                                  |                          | UDP-glycosyltransferase  |          |          |          |
| FtPinG0002704400.01 | UDP-glucose flavonoid<br>3-O-glucosyltransferase | metabolic process        | family                   | 4.074893 | 3.256418 | 1.369774 |
|                     |                                                  |                          | UDP-glycosyltransferase  |          |          |          |
| FtPinG0007577000.01 | UDP-glucose flavonoid<br>3-O-glucosyltransferase | metabolic process        | family                   | 0.254487 | 0.133343 | 0.220311 |
|                     |                                                  |                          | UDP-glycosyltransferase  |          |          |          |
| FtPinG0002956600.01 | UDP-glucose flavonoid<br>3-O-glucosyltransferase | metabolic process        | family                   | 1.538151 | 0.113106 | 1.74673  |
|                     |                                                  |                          | UDP-glycosyltransferase  |          |          |          |
| FtPinG0003585500.01 | UDP-glucose flavonoid                            | metabolic process        | UDP-glycosyltransferase  | 1.707956 | 3.568884 | 18.53741 |

|                     |                            |                          |                         |          |          |          |
|---------------------|----------------------------|--------------------------|-------------------------|----------|----------|----------|
|                     | 3-O-glucosyltransferase    |                          | family                  |          |          |          |
| FtPinG0003186500.01 | UDP-glucose flavonoid      | metabolic process        | UDP-glycosyltransferase | 7.891746 | 4.365215 | 0.889886 |
|                     | 3-O-glucosyltransferase    |                          | family                  |          |          |          |
| FtPinG0006615400.01 | UDP-glucose flavonoid      | metabolic process        | UDP-glycosyltransferase | 10.31112 | 17.67281 | 11.56381 |
|                     | 3-O-glucosyltransferase    |                          | family                  |          |          |          |
| FtPinG0003186900.01 | UDP-glucose flavonoid      | metabolic process        | UDP-glycosyltransferase | 0.010209 | 0        | 0        |
|                     | 3-O-glucosyltransferase    |                          | family                  |          |          |          |
| FtPinG0003585700.01 | UDP-glucose flavonoid      | metabolic process        | UDP-glycosyltransferase | 3.370236 | 2.244972 | 0.785647 |
|                     | 3-O-glucosyltransferase    |                          | family                  |          |          |          |
| FtPinG0003585900.01 | UDP-glucose flavonoid      | metabolic process        | UDP-glycosyltransferase | 1.17426  | 0.071696 | 0.008675 |
|                     | 3-O-glucosyltransferase    |                          | family                  |          |          |          |
| FtPinG0003629500.01 | Flavonoid 3'-monooxygenase | anthocyanin biosynthesis | cytochrome P450 family  | 1.55294  | 2.792627 | 6.289344 |
| FtPinG0002353900.01 | Flavonoid 3'-monooxygenase | flavonoid biosynthesis   | cytochrome P450 family  | 54.95068 | 33.46139 | 14.36979 |
| FtPinG0001470800.01 | Flavonoid 3'-monooxygenase | flavonoid biosynthesis   | cytochrome P450 family  | 0        | 0.009248 | 0        |
| FtPinG0008925900.01 | Flavonoid 3'-monooxygenase | flavonoid biosynthesis   | cytochrome P450 family  | 0        | 0        | 0        |
| FtPinG0003630100.01 | Flavonoid 3'-monooxygenase | flavonoid biosynthesis   | cytochrome P450 family  | 0.020337 | 0.010122 | 0.123129 |
| FtPinG0003629700.01 | Flavonoid 3'-monooxygenase | flavonoid biosynthesis   | cytochrome P450 family  | 5.429075 | 6.165407 | 11.73077 |
| FtPinG0001470600.01 | Flavonoid 3'-monooxygenase | flavonoid biosynthesis   | cytochrome P450 family  | 6.173626 | 11.31342 | 3.404723 |
| FtPinG0003632500.01 | Flavonoid 3'-monooxygenase | flavonoid biosynthesis   | cytochrome P450 family  | 0.12381  | 0        | 0.02524  |
| FtPinG0001471000.01 | Flavonoid 3'-monooxygenase | flavonoid biosynthesis   | cytochrome P450 family  | 0.025532 | 0.045975 | 0        |
| FtPinG0003628300.01 | Flavonoid 3'-monooxygenase | flavonoid biosynthesis   | cytochrome P450 family  | 0        | 0        | 0        |
| FtPinG0003630300.01 | Flavonoid 3'-monooxygenase | flavonoid biosynthesis   | cytochrome P450 family  | 0.056159 | 0        | 0.027987 |

157

158

159

160

161

162

163

**Table S6** Validation of the transcriptome data by qRT-PCR.

| GeneID                                  | X2_fpkm | X3_fpkm | X4_fpkm | X2_relative expression | X3_relative expression | X4_relative expression |
|-----------------------------------------|---------|---------|---------|------------------------|------------------------|------------------------|
| FtPinG0000494800.01( <i>FtAGL9</i> )    | 31.816  | 15.209  | 6.792   | 11.567                 | 3.600                  | 1.019                  |
| FtPinG0002495300.01( <i>FtAGL</i> )     | 332.842 | 127.130 | 16.869  | 47.840                 | 5.776                  | 1.007                  |
| FtPinG0003934400.01( <i>FtGAIL</i> )    | 15.131  | 10.369  | 1.741   | 42.623                 | 13.902                 | 1.050                  |
| FtPinG0004500000.01( <i>FtSEPI</i> )    | 26.014  | 15.114  | 5.850   | 7.592                  | 1.819                  | 1.006                  |
| FtPinG0004510400.01( <i>FtSEPI1L</i> )  | 120.021 | 64.465  | 11.890  | 15.015                 | 3.271                  | 1.087                  |
| FtPinG0005096000.01( <i>FtSEPI-2</i> )  | 47.541  | 9.668   | 1.143   | 8.480                  | 2.246                  | 1.058                  |
| FtPinG0005485500.01( <i>FtSEP3L</i> )   | 2.772   | 2.265   | 1.776   | 1.013                  | 0.196                  | 0.003                  |
| FtPinG0006608000.01( <i>FtSEP1L-2</i> ) | 100.210 | 78.249  | 21.659  | 141.373                | 16.118                 | 1.004                  |
| FtPinG0003900700.01( <i>FtPAL</i> )     | 76.289  | 29.199  | 10.028  | 1.009                  | 0.814                  | 0.389                  |
| FtPinG0008131000.01( <i>FtCHS</i> )     | 200.660 | 265.028 | 24.329  | 11.809                 | 19.677                 | 1.011                  |
| FtPinG0002790600.01( <i>FtCHI</i> )     | 65.469  | 50.188  | 7.609   | 16.895                 | 8.093                  | 1.003                  |
| FtPinG0006907100.01( <i>FtFLS</i> )     | 335.077 | 389.079 | 77.871  | 2.475                  | 3.982                  | 1.014                  |
| FtPinG0006606900.01( <i>FtUFGT</i> )    | 128.934 | 91.673  | 67.730  | 2.019                  | 1.976                  | 1.000                  |

165

166

167

168

169

170

171

172

173

174

175

176

177

**Table S7** Primers of sequences.

| Gene ID                                  | Forward primer (5' - 3')   | Reverse primer (5' - 3')  |
|------------------------------------------|----------------------------|---------------------------|
| FtPinG0000494800.01 ( <i>FtAGL9</i> )    | ACGAACCCAGGTCACGAAATC      | AAGCCACGCACCAGGAATG       |
| FtPinG0002495300.01 ( <i>FtAGL</i> )     | GCCCAGTATTATCAGCAAGAAGC    | GCTACTGAGCCCTTACCCAT      |
| FtPinG0003934400.01 ( <i>FtGAIL</i> )    | ACCGCCAATCAAGCGATACTC      | TGAGTGCAAGGGCTTGGATTA     |
| FtPinG0004500000.01 ( <i>FtSEPI</i> )    | TGCAAAGAGGAGAAATGGCC       | GCTGGTGCTGGAGAACTCATAGA   |
| FtPinG0004510400.01 ( <i>FtSEPI1</i> )   | GGTCATCAACAACATCCTCAATCTC  | CACTTGACCCACATTTGTAGTTTGA |
| FtPinG0005096000.01 ( <i>FtSEPI-2</i> )  | GCAATGTAACAGCAGCCTTCAA     | AGCAACCACTCAGTCGCAAAC     |
| FtPinG0005485500.01 ( <i>FtSEPI3</i> )   | ATTCCTCACGCAAATTATCACCTC   | CAGCTCTTTCATGCTTAAACTCGA  |
| FtPinG0006608000.01 ( <i>FtSEPI1-2</i> ) | AAGATGCTGAAGATGCTGACAACCTC | CATAGCCATGTGACTGTAACCGA   |
| FtPinG0003900700.01 ( <i>FtPAL</i> )     | AGATCAACTCCGTCAACGATAACC   | AGCTCTGAGAATTGGGCAAACA    |
| FtPinG0008131000.01 ( <i>FtCHS</i> )     | GATTGCTCATCTGGTGGTCC       | CGATTCTTCTCATCTCGTCCAT    |
| FtPinG0002790600.01 ( <i>FtCHI</i> )     | GCTGCTCGACTCTATGAACTGCT    | ATGGCTATGGAGGATACGGTAATT  |
| FtPinG0006907100.01 ( <i>FtFLS</i> )     | CCAATGCTCTCATCGTTCACGT     | CAAGAACACAGGCCACGACATC    |
| FtPinG0006606900.01 ( <i>FtUFGT</i> )    | TGGCTGATGCCTTTCTGTCCG      | AGTCTTCATAGTGTGCTTCTCCGG  |
| FtPinG0002353900.01 ( <i>FtF3'H</i> )    | GAGATTTGACAGCTTTATCGGACAG  | AAGAGCAGAGCCTTGATTCAGTAT  |
| FtPinG0003628500.01 ( <i>FtF3'5'H</i> )  | ATGGAGGATGCTACGAAAGGTCT    | CGTACCACGTTTATTGCTGTT     |
| FtPinG0005072700.01 ( <i>FtACL</i> )     | TAATGGTGAGGTTTCTGTGGCA     | CGGAATTGCGTGAACGAAGTAC    |
| FtPinG0001575100.01 ( <i>FtCAH</i> )     | AATCTCGTGGTTCGTCCTGTC      | GTCATTATCCGCCGCATCTT      |
| FtPinG0000381200.01 ( <i>FtNST1</i> )    | CGATTTAGGAGGAGATGAAGGGT    | GAGTCGAGTTTCGGTTGTTGGT    |
| FtPinG0002596000.01 ( <i>FtNST1-2</i> )  | CATGCTTGCCGCTCACTTAAAC     | TGCGGTGATGGACGGGTAGTA     |
| FtPinG0007471500.01 ( <i>FtNST2</i> )    | AGCTTCAACCGCAACTGG         | GACTCACCGTATGCTCCTCTGG    |
| <i>FtH3</i>                              | GAAATTCGCAAGTACCAGAAGAG    | CCAACAAGGTATGCCTCAGC      |
